# Supplementary material
Source: PubMed Central journal article supplement (PMC4817687)

NSTI (Nearest Sequenced Taxon Index)

a

a b

a b c

a b

**Genomes Included**

- IMG 4.2
- IMG 4.2 + ZIG (all)
- IMG 4.2 + ZIG (no novel)
- IMG 4.2 + ZOR0006 (CK-1C4-19) only

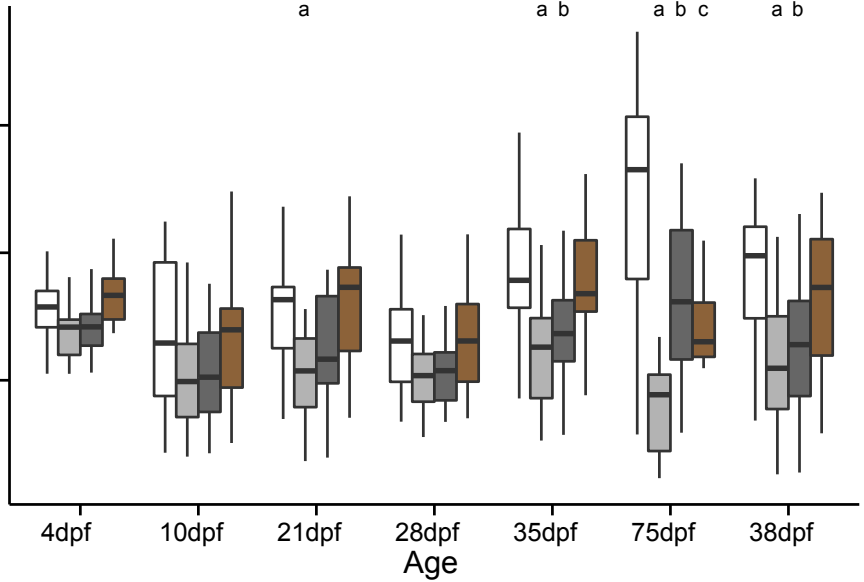

Supplement: ismej2015140x4.pdf [file ismej2015140x4.pdf]
