# Supplementary material
Source: PubMed Central journal article supplement (PMC4817687)

# Zebrafish intestinal microbiota

Parents  
(320 dpf)

4 dpf

10 dpf

21 dpf

28 dpf

35 dpf

75 dpf

380 dpf

Water

Surface

Food

Embryo media

4 dpf

10 dpf

75 dpf

4 dpf

10 dpf

75 dpf

10 dpf

75 dpf

10 dpf

75 dpf

Embryo media

## Class

- Other
- Chloroflexi
- Bacteroidia
- Oscillatoriothycideae
- Mollicutes
- Flavobacteriia
- Planctomycetia
- Clostridia
- Actinobacteria
- Sphingobacteria
- Bacilli
- δ-proteobacteria
- CK-1C4-19
- Fusobacteria
- α-proteobacteria
- β-proteobacteria
- γ-proteobacteria

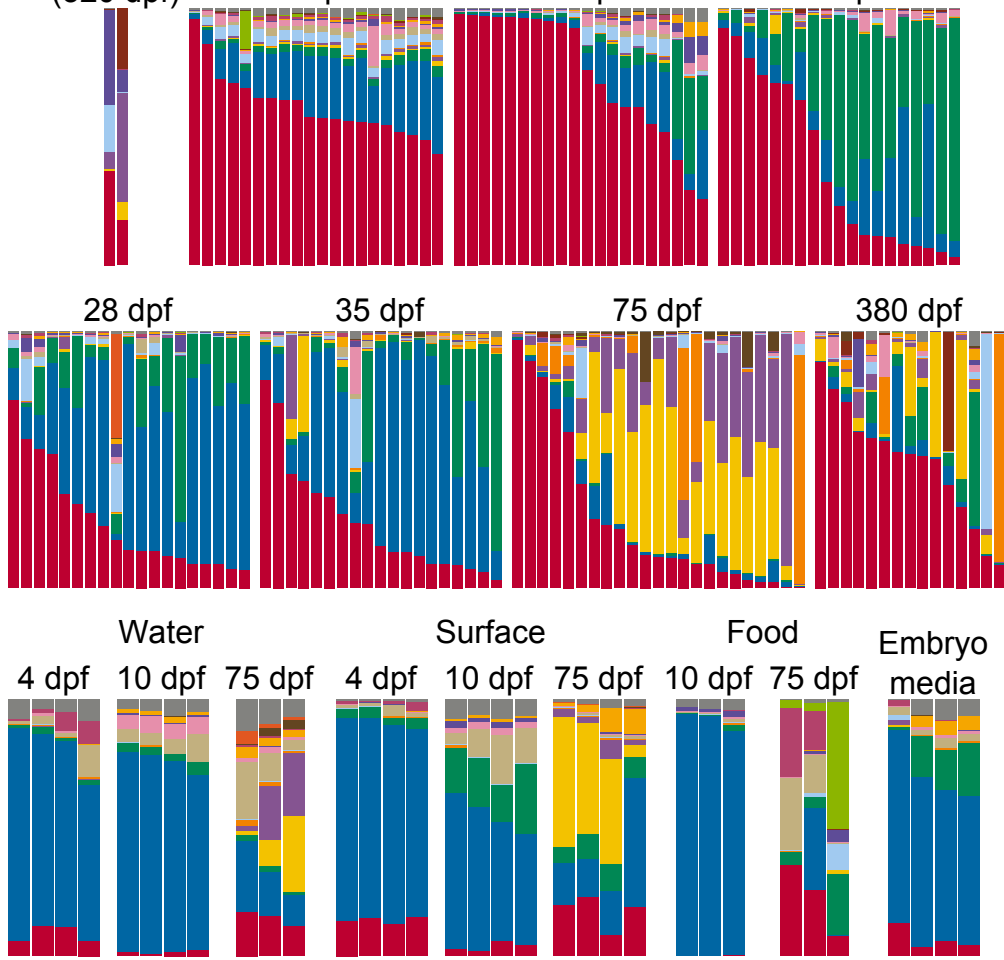

Supplement: ismej2015140x5.pdf [file ismej2015140x5.pdf]
