# Supplementary material
Source: PubMed Central journal article supplement (PMC4817687)
Supplement: ismej2015140x6.pdf [file ismej2015140x6.pdf]

## Fish Age

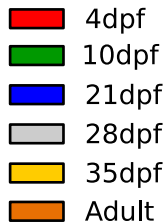

## Taxa

### (below Class)

- a: g\_Corynebacterium
- b: f\_Corynebacteriaceae
- c: g\_Arthrobacter
- d: g\_Mycobacterium
- e: f\_Mycobacteriaceae
- f: f\_Bacteroidaceae
- g: o\_Flavobacteriales
- h: f\_Chitinophagaceae
- i: g\_CandidatusRhabdochlamydia
- j: f\_Rhabdochlamydiaceae
- k: f\_Phormidiaceae
- \* l: g\_Staphylococcus
- m: g\_Lactobacillus
- n: g\_Streptococcus
- o: g\_Clostridium
- \* p: g\_Cetobacterium
- q: f\_Isosphaeraceae

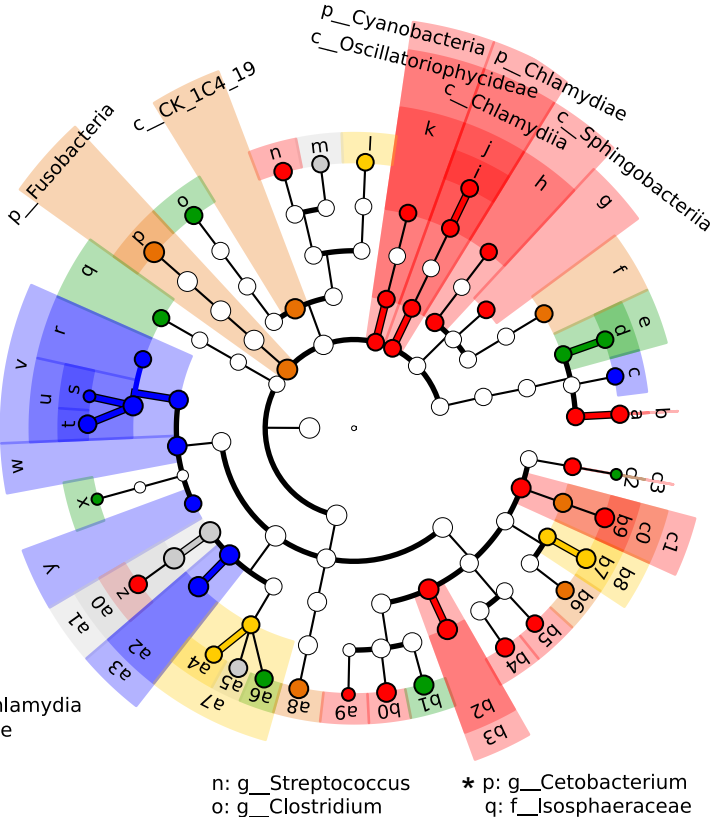

- r: f\_Methylcyostaceae
- s: g\_CandidatusLiberibacter
- t: g\_Rhizobium
- u: f\_Rhizobiaceae
- v: o\_Rhizobiales
- w: o\_Rhodobacterales
- x: g\_Azospirillum
- y: o\_Rickettsiales
- z: g\_Pelomonas
- a0: f\_Comamonadaceae
- a1: o\_Burkholderiales
- a2: f\_Neisseriaceae
- a3: o\_Neisseriales
- a4: g\_Dechloromonas
- a5: g\_Uliginosibacterium
- a6: g\_Zoogloea
- a7: f\_Rhodocyclaceae
- a8: g\_Lawsonia
- a9: g\_Thalassomonas
- b0: g\_Pseudoalteromonas
- \* b1: g\_Shewanella
- b2: f\_Enterobacteriaceae
- b3: o\_Enterobacteriales
- b4: g\_Halomonas
- b5: g\_Marinomonas
- \* b6: g\_Acinetobacter
- \* b7: g\_Pseudomonas
- b8: f\_Pseudomonadaceae
- \* b9: g\_Vibrio
- c0: f\_Vibrionaceae
- c1: o\_Vibrionales
- c2: g\_Thermomonas
- c3: f\_Xanthomonadaceae
