# Supplementary material
Source: PubMed Central journal article supplement (PMC4817687)
Supplement: ismej2015140x7.pdf [file ismej2015140x7.pdf]

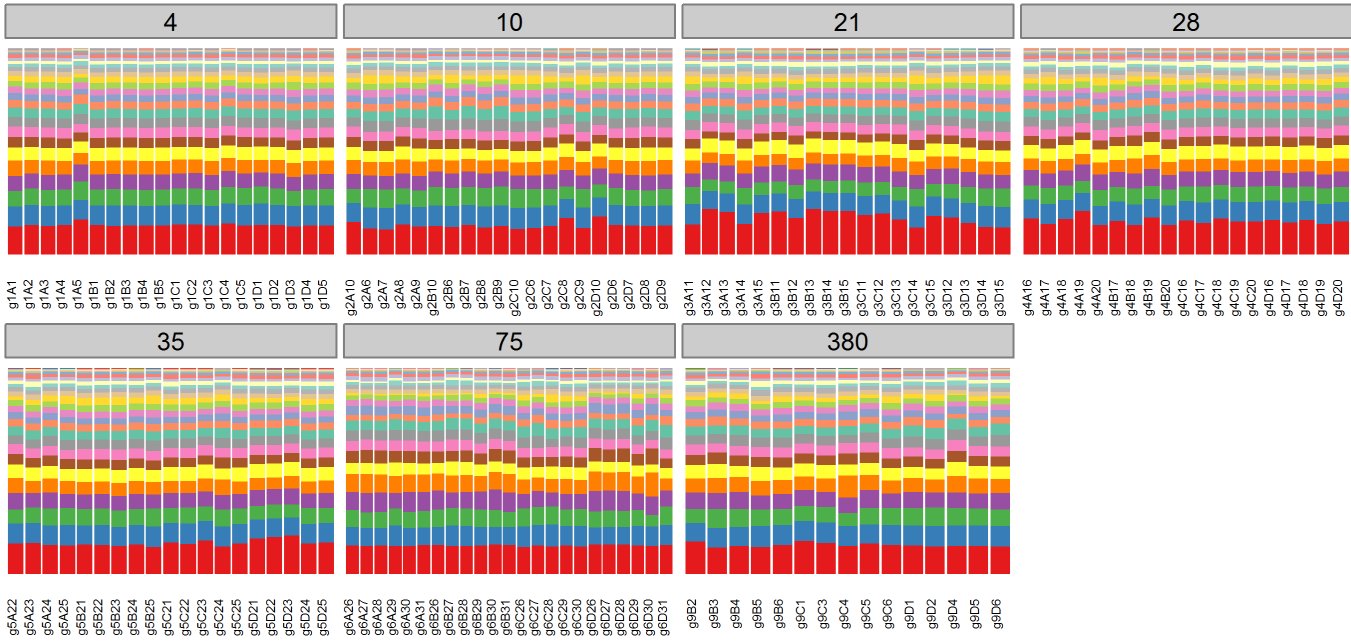

- |                                                                                                                                                                                                                                                                                                                                                                                                                                                                                                                                                                                                                                                                                                                                                                                                                                                                                                                                                                                                                                                                                                                                        |                                                                                                                                                                                                                                                                                                                                                                                                                                                                                                                                                                                                                                                                                                                                                                                                                                                                                                                                                                                                      |
|----------------------------------------------------------------------------------------------------------------------------------------------------------------------------------------------------------------------------------------------------------------------------------------------------------------------------------------------------------------------------------------------------------------------------------------------------------------------------------------------------------------------------------------------------------------------------------------------------------------------------------------------------------------------------------------------------------------------------------------------------------------------------------------------------------------------------------------------------------------------------------------------------------------------------------------------------------------------------------------------------------------------------------------------------------------------------------------------------------------------------------------|------------------------------------------------------------------------------------------------------------------------------------------------------------------------------------------------------------------------------------------------------------------------------------------------------------------------------------------------------------------------------------------------------------------------------------------------------------------------------------------------------------------------------------------------------------------------------------------------------------------------------------------------------------------------------------------------------------------------------------------------------------------------------------------------------------------------------------------------------------------------------------------------------------------------------------------------------------------------------------------------------|
| <ul style="list-style-type: none"> <li>Environmental, Information Processing, Membrane, Transport</li> <li>Unclassified, Poorly Characterized</li> <li>Unclassified, Cellular Processes, and Signaling</li> <li>Metabolism, Carbohydrate, Metabolism</li> <li>Genetic, Information Processing, Translation</li> <li>Metabolism, Amino Acid, Metabolism</li> <li>Genetic, Information Processing, Replication, and Repair</li> <li>Metabolism, Metabolism of Cofactors, and Vitamins</li> <li>Unclassified, Metabolism</li> <li>Unclassified, Genetic, Information Processing</li> <li>Genetic, Information Processing, Transcription</li> <li>Metabolism, Nucleotide, Metabolism</li> <li>Metabolism, Enzyme Families</li> <li>Metabolism, Energy, Metabolism</li> <li>Cellular Processes, Cell Motility</li> <li>Genetic, Information Processing, Folding, Sorting, and Degradation</li> <li>Metabolism, Lipid, Metabolism</li> <li>Environmental, Information Processing, Signal, Transduction</li> <li>Metabolism, Xenobiotics, Biodegradation, and Metabolism</li> <li>Metabolism, Glycan, Biosynthesis, and Metabolism</li> </ul> | <ul style="list-style-type: none"> <li>Metabolism, Metabolism of Terpenoids, and Polyketides</li> <li>Metabolism, Metabolism of Other Amino Acids</li> <li>Metabolism, Biosynthesis of Other Secondary Metabolites</li> <li>Cellular Processes, Cell Growth, and Death</li> <li>Organismal Systems, Endocrine System</li> <li>Environmental, Information Processing, Signaling, Molecules, and Interaction</li> <li>Human Diseases, Infectious Diseases</li> <li>Human Diseases, Neurodegenerative Diseases</li> <li>Organismal Systems, Environmental, Adaptation</li> <li>Organismal Systems, Nervous System</li> <li>Human Diseases, Cancers</li> <li>Organismal Systems, Circulatory System</li> <li>Organismal Systems, Excretory System</li> <li>Organismal Systems, Digestive System</li> <li>Cellular Processes, Transport and Catabolism</li> <li>Organismal Systems, Immune System</li> <li>Human Diseases, Immune System, Diseases</li> <li>Organismal Systems, Sensory System</li> </ul> |
|----------------------------------------------------------------------------------------------------------------------------------------------------------------------------------------------------------------------------------------------------------------------------------------------------------------------------------------------------------------------------------------------------------------------------------------------------------------------------------------------------------------------------------------------------------------------------------------------------------------------------------------------------------------------------------------------------------------------------------------------------------------------------------------------------------------------------------------------------------------------------------------------------------------------------------------------------------------------------------------------------------------------------------------------------------------------------------------------------------------------------------------|------------------------------------------------------------------------------------------------------------------------------------------------------------------------------------------------------------------------------------------------------------------------------------------------------------------------------------------------------------------------------------------------------------------------------------------------------------------------------------------------------------------------------------------------------------------------------------------------------------------------------------------------------------------------------------------------------------------------------------------------------------------------------------------------------------------------------------------------------------------------------------------------------------------------------------------------------------------------------------------------------|
