# Supplementary material
Source: PubMed Central journal article supplement (PMC4817687)

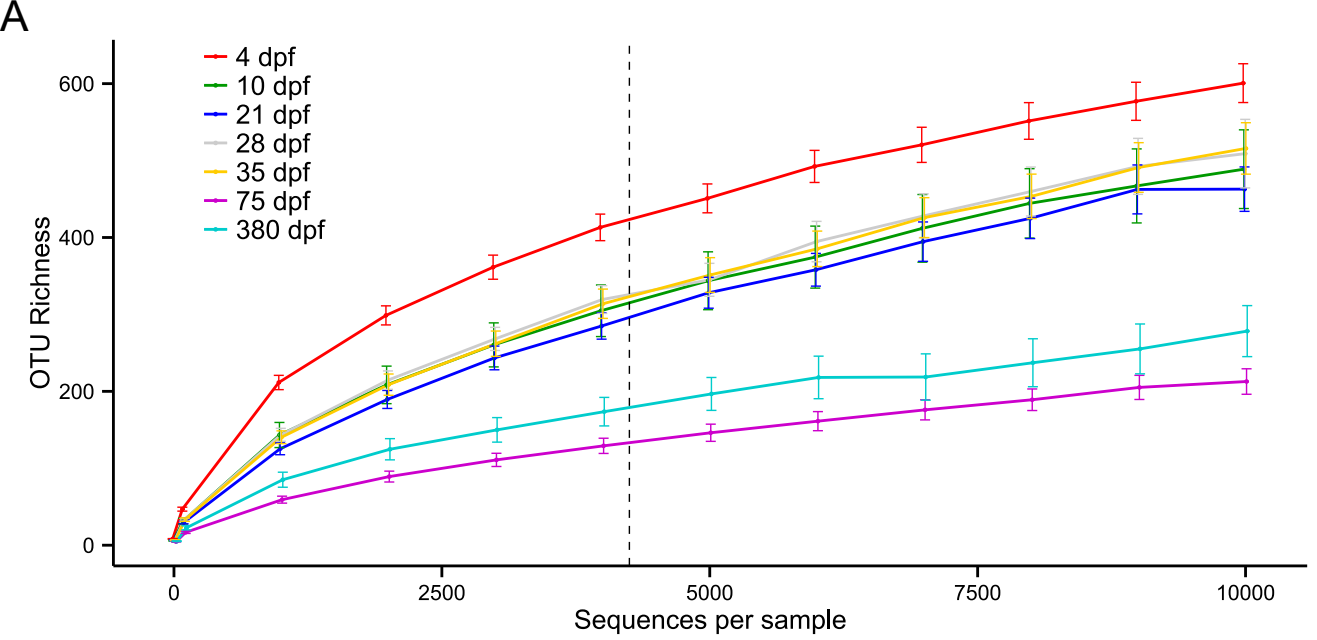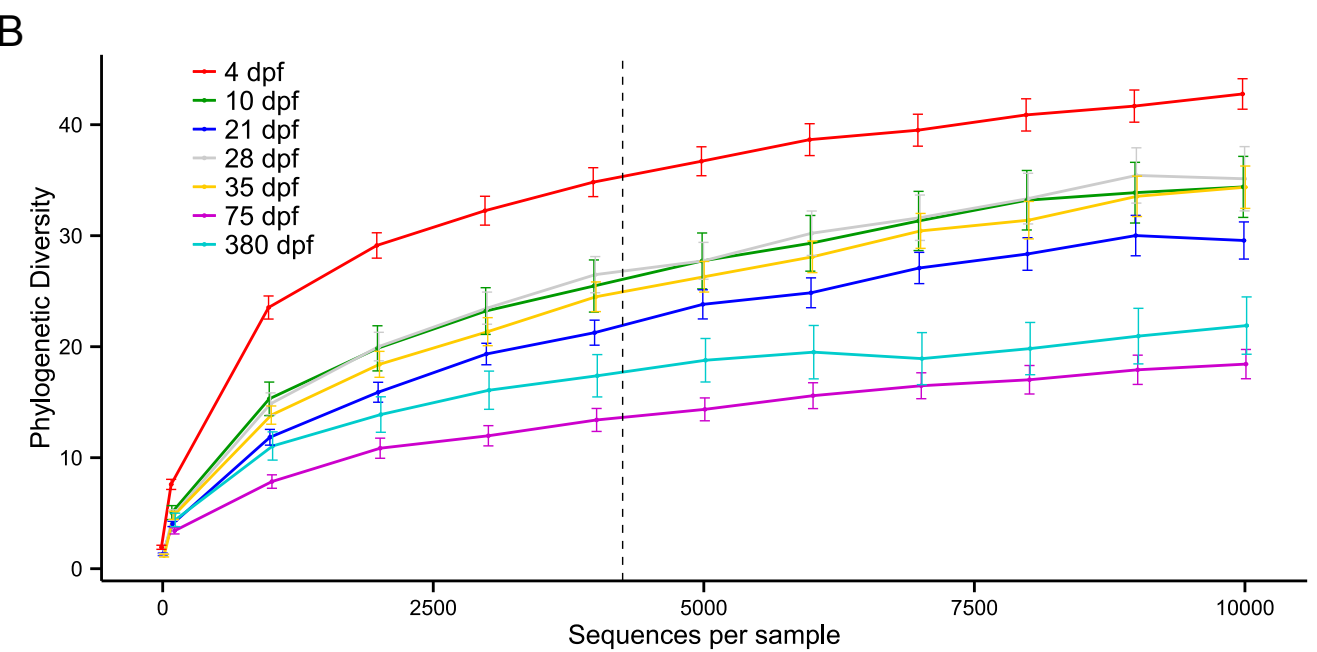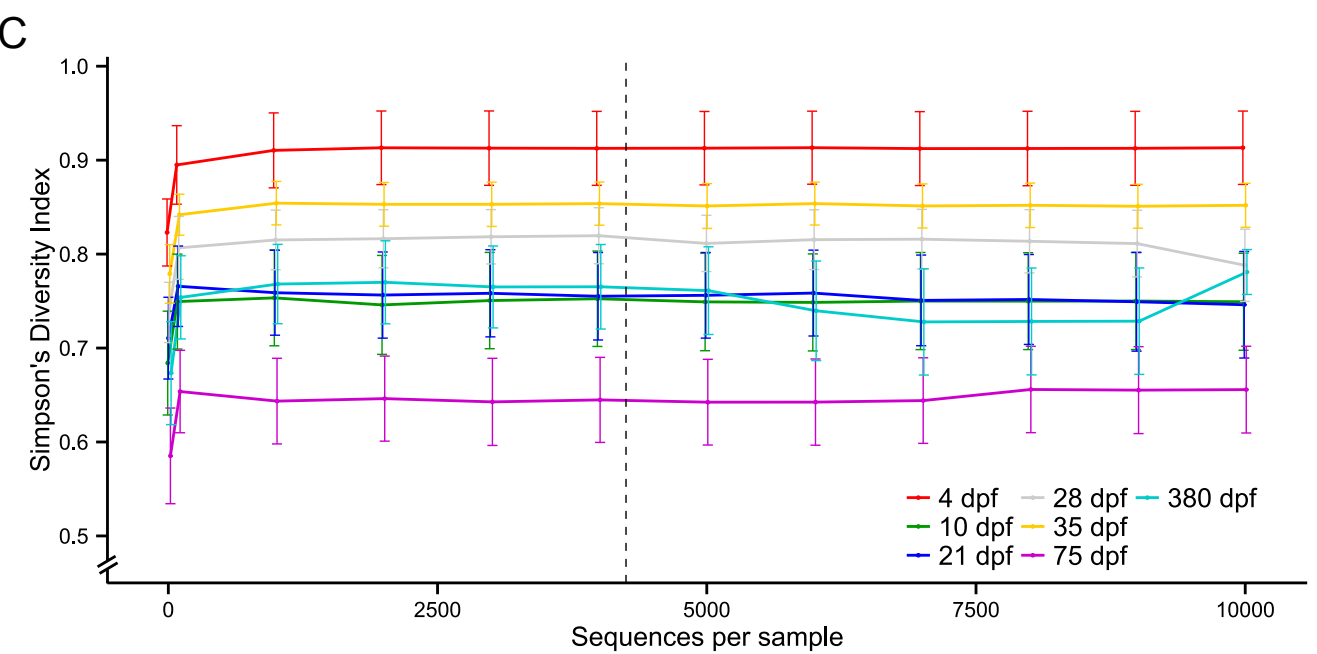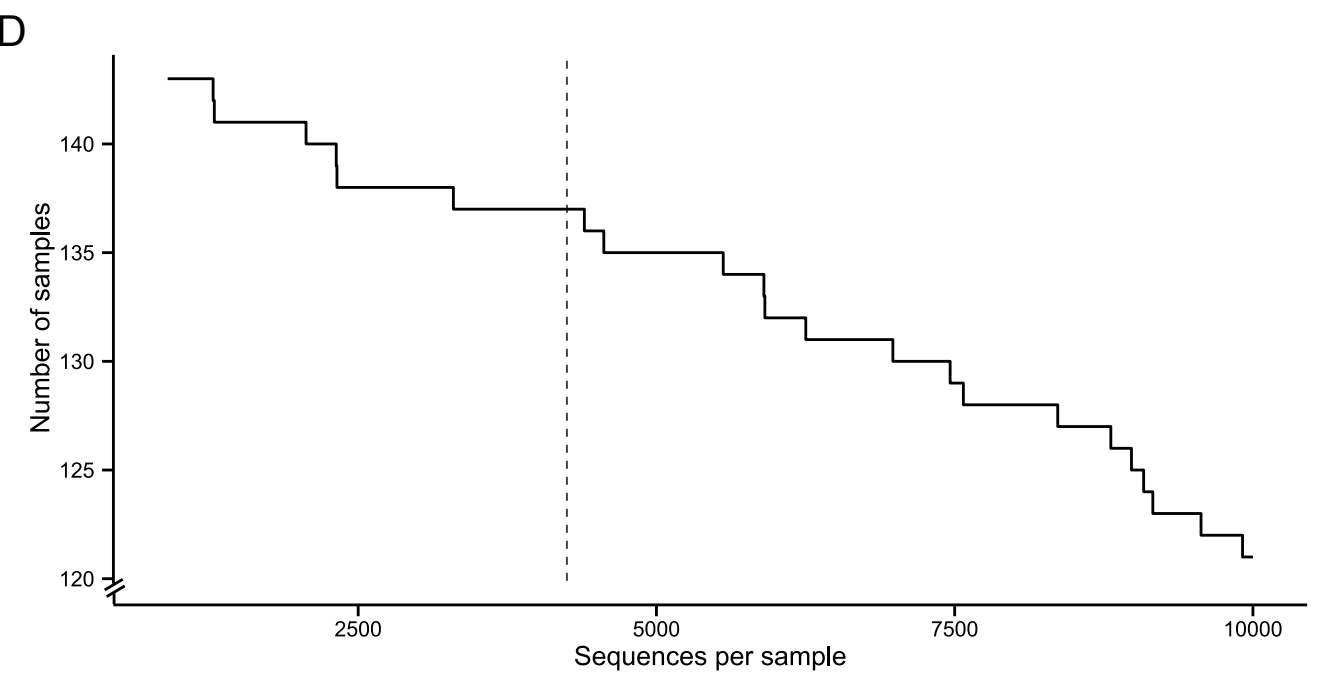

Supplement: ismej2015140x3.pdf [file ismej2015140x3.pdf]

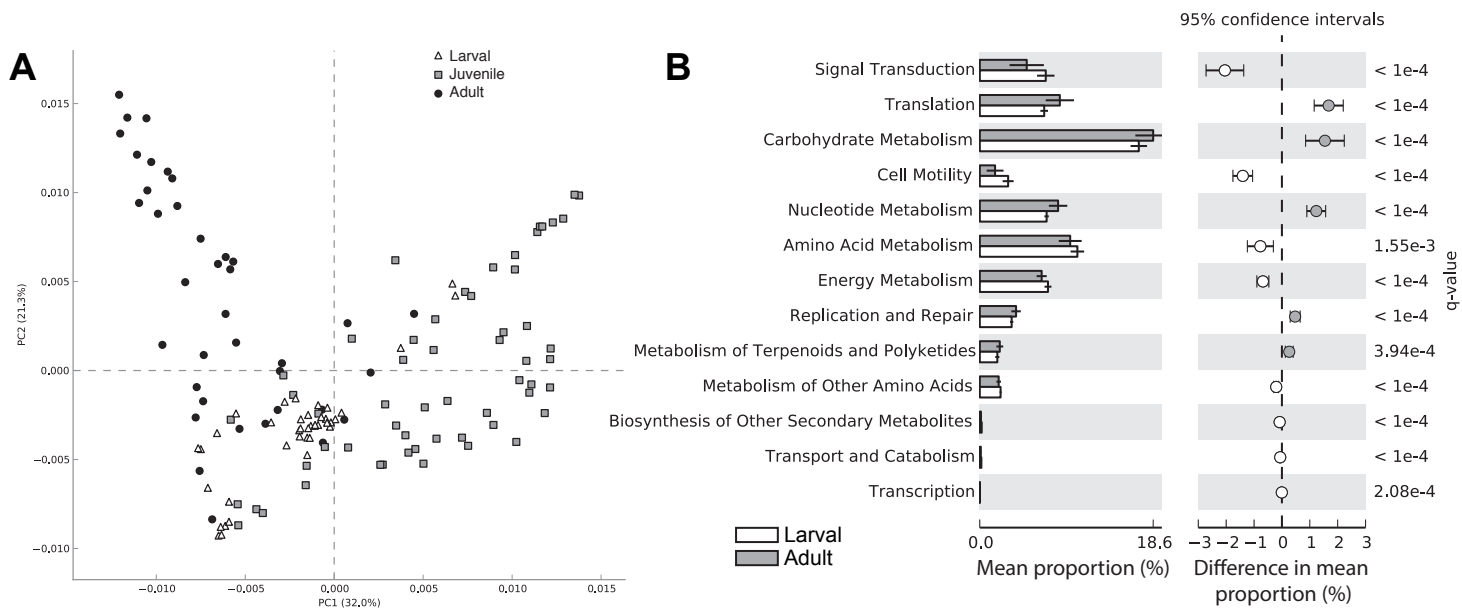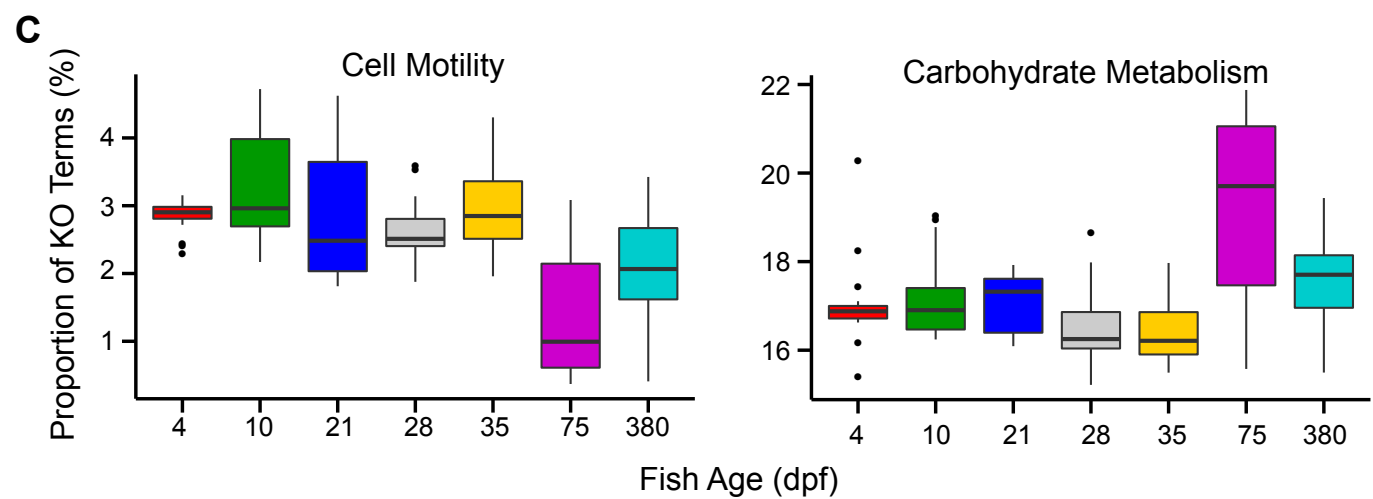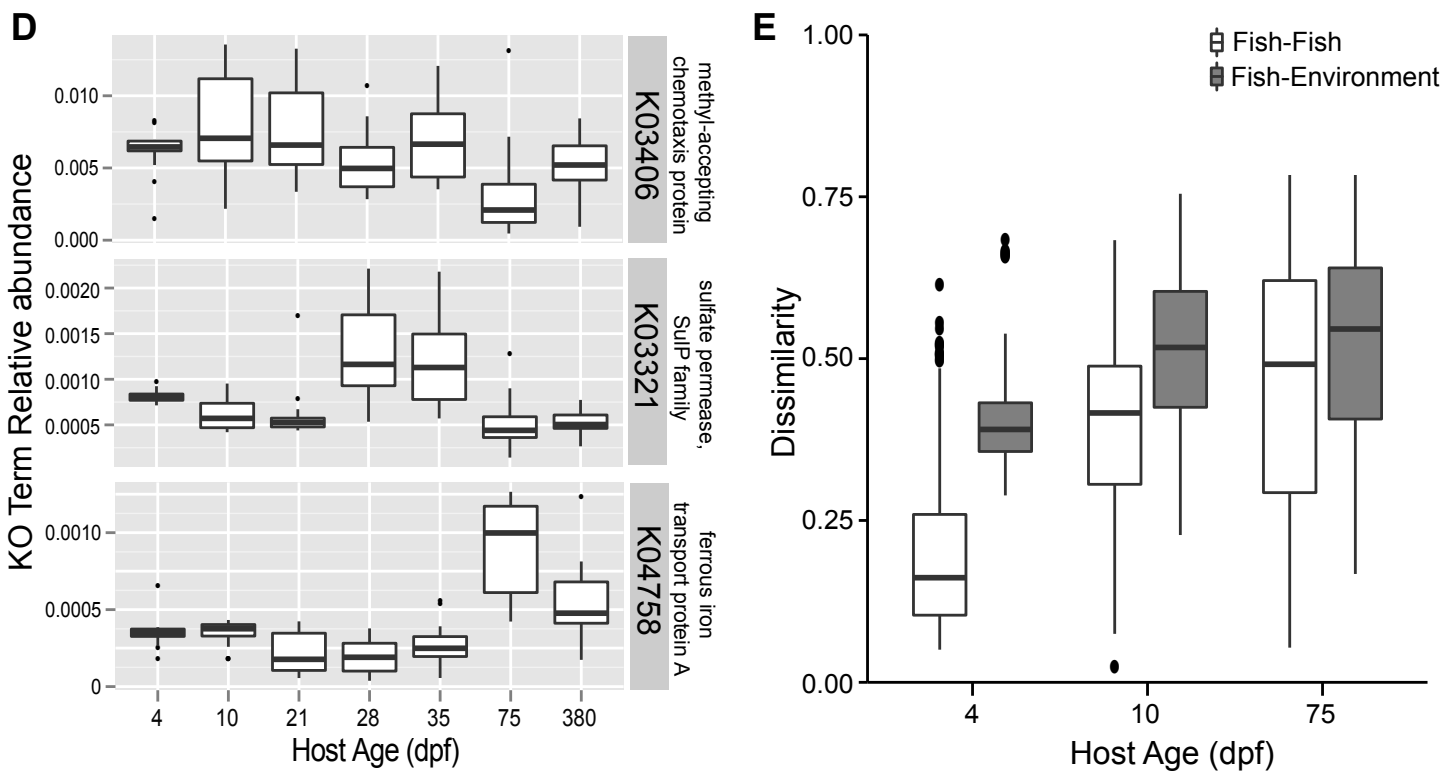

Supplement: ismej2015140x8.pdf [file ismej2015140x8.pdf]
